# Supplementary material for: Impact of a Low-Insulin-Stimulating Bread on Weight Development—A Real Life Randomised Controlled Trial
Source: MDPI journal article supplement (doi:10.3390/nu15051301), 2023-03-06
Supplement: s1 [file s1]

## Supplementary Material

**Table S1: Differences after 3 months.**

|                                               | <b>Control group (n=40)</b> | <b>Intervention group (n=40)</b> |
|-----------------------------------------------|-----------------------------|----------------------------------|
| Waist circumference (cm)                      | -0.5 [-1.7; 0.8]            | -0.3 [-1.4; 0.8]                 |
| Fat mass (kg)                                 | -0.4 [-1.1; 0.4]            | -0.6 [-1.4; 0.2]                 |
| Fat free mass (kg)                            | -0.3 [-1.0; 0.3]            | -1.0 [-1.7; 0.1]                 |
| Systolic blood pressure (mmHg)                | 0.3 [-2.8; 3.4]             | 0.3 [-2.9; 3.4]                  |
| Diastolic blood pressure (mmHg)               | -1.5 [-3.2; 0.2]            | 0.6 [-1.1; 2.4]                  |
| Fasting blood glucose (mg/dl)                 | 0.3 [-2.8; 3.2]             | 1.3 [-1.9; 4.4]                  |
| Fasting insulin ( $\mu$ U/ml)                 | 0.4 [-2.0; 2.8]             | 1.5 [-0.9; 3.9]                  |
| HbA1c (%)                                     | -0.04 [-0.09; 0.02]         | -0.05 [-0.10; 0.00]              |
| Cholesterol (mg/dl)                           | 1 [-6; 7]                   | 1 [-5; 8]                        |
| LDL cholesterol (mg/dl)                       | 1 [-1; 3]                   | 0 [-3; 2]                        |
| LDL cholesterol (mg/dl)                       | -4 [-10; 1]                 | -3 [-9; 3]                       |
| Triglycerides (mg/dl)                         | 4 [-13; 20]                 | 5 [-12; 21]                      |
| Physical activity (0-1/2-3/4-5/>5 h/week) (%) | 12.5/30/12.5/45             | 22.5/27.5/27.5/12.5              |

Data are shown as mean [95% CI]. Differences in changes after 3 months between both groups were analysed using ANCOVA adjusting for baseline values.
